# Supplementary material for: Staff experiences of closing out a clinical trial involving withdrawal of treatment: qualitative study
Source: Springer Nature journal article supplement (doi:10.1186/s13063-017-1813-y), 2017-02-07
Supplement: MOESM1 [file 12053016]

**Table 1: Participant characteristics. For Diabetes Consultants and Educators and their experience of providing pump therapy.**

|                                       | <b>N</b> | <b>%</b> |
|---------------------------------------|----------|----------|
| <b><i>REPOSE SITES (n=7)</i></b>      |          |          |
| Interviewees per site (range)         | 1-5      |          |
| Interviewees per site (mode)          | 3        |          |
| <b><i>ROLE</i></b>                    |          |          |
| Diabetes Consultants                  | 7        | 33       |
| Educators                             | 14       | 66       |
| <b><i>PUMP THERAPY EXPERIENCE</i></b> |          |          |
| < 5 years                             | 5        | 24       |
| 5-10 years                            | 9        | 42       |
| >10 - 15 years                        | 7        | 34       |
